# Supplementary material for: Naked-eye and ratiometric fluorescence probe for fast and sensitive detection of hydrogen sulfide and its application in bioimaging
Source: Royal Society of Chemistry journal article supplement (doi:10.1039/c8nj04208j), 2018-01-01
Supplement: c8nj04208j1.pdf [file c8nj04208j1.pdf]

## Supporting information

### **Naked-eye and ratiometric fluorescence probe for fast and sensitive detection of hydrogen sulfide and its application in bioimaging**

Jianlong Ma<sup>ac</sup>, Feifei Li<sup>bc</sup>, Qiang Li<sup>b</sup>, Yijing Li<sup>a</sup>, Chaoxian Yan<sup>d</sup>, Xiaofeng Lu<sup>a\*</sup> and

Yong Guo<sup>a\*</sup>

<sup>a</sup>Key Laboratory of Chemistry of Northwestern Plant Resources and Key Laboratory for Natural Medicine of Gansu Province, Lanzhou Institute of Chemical Physics, Chinese Academy of Sciences, Lanzhou Gansu 730000, P. R. China; <sup>b</sup>Key Laboratory of Heavy Ion Radiation Biology and Medicine of Chinese Academy of Sciences, Institute of Modern Physics, Chinese Academy of Sciences, Lanzhou 730000, P. R. China; <sup>c</sup> University of the Chinese Academy of Sciences, 100049, Beijing, P. R. China.

<sup>d</sup>State Key Laboratory of Applied Organic Chemistry Lanzhou University

\* E-mail: guoyong@licp.cas.cn

\* E-mail: luxf@licp.cas.cn

## Contents

Part 1: Synthetic procedures in detail;

Part 2: <sup>1</sup>H NMR, <sup>13</sup>C NMR and Mass spectra (Figure S1-S9);

Part 3: Supporting figures (Figure S10-S25).

### 1. Synthetic procedures in detail

Synthesis of **Compound 1**. The dark green solid with metallic luster was obtained with great yield (88%). <sup>1</sup>H NMR (400 MHz, CD<sub>3</sub>OD) δ (ppm): 8.46 (d, *J* = 14.1 Hz, 2H), 7.54 (d, *J* = 7.4 Hz, 2H), 7.44 (t, *J* = 7.7 Hz, 2H), 7.38 – 7.27 (m, 4H), 6.30 (d, *J* = 14.1 Hz, 2H), 4.23 (d, *J* = 7.2 Hz, 4H), 2.75 (t, *J* = 6.1 Hz, 4H), 2.02 – 1.94 (m, 2H), 1.75 (s, 12H), 1.42 (t, *J* = 7.2 Hz, 6H). <sup>13</sup>C NMR (100 MHz, CD<sub>3</sub>OD) δ (ppm): 173.83, 151.10, 145.63, 143.15, 142.73, 129.94, 127.91, 126.56, 123.57, 112.05, 101.95, 50.65, 40.35, 28.23, 27.35, 22.12, 12.50. ESI-MS calcd for C<sub>34</sub>H<sub>40</sub>ClN<sub>2</sub><sup>+</sup> (M<sup>+</sup>): 511.29. Found: 511.29.

Synthesis of **Compound 2**. In detail, under nitrogen atmosphere, K<sub>2</sub>CO<sub>3</sub> (311 mg, 2.50 mmol) was added rapidly to resorcinol (275 mg, 2.50 mmol) in anhydrous acetonitrile (6 mL) at room temperature, and the resulting mixture was stirred for 15 min. Then a solution of compound **1** (590 mg, 1.00 mmol) in 10 mL of anhydrous acetonitrile was introduced to the above mixture via a syringe and the mixture was heated at 50 °C for 4 h. After the reaction was complete, the solvent was evaporated under reduced pressure and the residue was purified by column chromatography (dichloromethane: methanol=100:1) on silica gel. Obtaining the desired product (362 mg, yield: 76%) as a blue powder. <sup>1</sup>H NMR (400 MHz, CD<sub>3</sub>OD) δ (ppm): 8.76 (d, *J* = 14.8 Hz, 1H), 7.65 (d, *J* = 7.6 Hz, 1H), 7.52 (d, *J* = 2.4 Hz, 2H), 7.45 (s, 2H), 7.43 – 7.39 (m, 1H), 6.86 (d, *J* = 6.7 Hz, 2H), 6.46 (d, *J* = 14.8 Hz, 1H), 4.43 – 4.31 (m, 2H), 2.79 (t, *J* = 6.4 Hz, 2H), 2.73 (t, *J* = 6.0 Hz, 2H), 2.00 – 1.91 (m, 2H), 1.82 (s, 6H), 1.48 (t, *J* = 7.2 Hz, 3H). <sup>13</sup>C NMR (100 MHz, CD<sub>3</sub>OD) δ (ppm): 177.94, 164.12, 163.62, 156.29, 146.63, 143.35, 142.65, 136.37, 130.47, 130.20, 128.02, 127.38, 123.80, 116.34, 116.08, 115.58, 113.32, 103.48, 102.97, 51.73, 41.20, 29.96, 28.32, 25.07, 21.74, 12.76. ESI-MS calcd for C<sub>27</sub>H<sub>28</sub>NO<sub>2</sub><sup>+</sup> (M<sup>+</sup>): 398.21. Found: 398.21.

Synthesis of **CyT**. Under nitrogen atmosphere, compound **2** (238 mg, 0.50 mmol) was stirred in 6ml dichloromethane and triethylamine mixed solution (v/v = 1:1) at 0 °C for 10 min. Then, triflic anhydride (423 mg, 1.50 mmol) dissolved in 1.5 mL of methylene chloride was added dropwise with continuously stirring. The solution was stirred for another 60 min at 0 °C and then 25 °C for 1 h. After the reaction was complete, 20 ml water poured into and extracted with 30 ml dichloromethane for 3

times. The water in organic phase was eliminated by adding excessive sodium sulphate anhydrous. Eventually the solvent was evaporated under reduced pressure and the residue was purified by column chromatography (dichloromethane:methanol=50:1) on silica gel. Affording the desired product (192 mg, yield: 63%) as purple sticky solid.  $^1\text{H}$  NMR (400 MHz,  $\text{CD}_3\text{OD}$ )  $\delta$  8.78 (d,  $J = 15.3$  Hz, 1H), 7.71 (dd,  $J = 15.1, 7.6$  Hz, 2H), 7.58 (m, 2H), 7.54 (dd,  $J = 9.1, 4.7$  Hz, 2H), 7.28 (dd,  $J = 8.6, 2.1$  Hz, 1H), 7.24 (s, 1H), 6.72 (d,  $J = 15.6$  Hz, 1H), 4.51 (q,  $J = 7.2$  Hz, 2H), 2.77 (dt,  $J = 18.0, 5.8$  Hz, 4H), 1.97 (dd,  $J = 17.2, 11.3$  Hz, 2H), 1.85 (s, 6H), 1.53 (t,  $J = 7.3$  Hz, 3H).  $^{13}\text{C}$  NMR (100 MHz,  $\text{CD}_3\text{OD}$ )  $\delta$  (ppm): 180.79, 159.96, 154.35, 151.48, 148.02, 144.36, 142.22, 133.15, 130.45, 130.34, 130.13, 129.59, 124.01, 123.62, 119.13, 116.48, 114.68, 110.82, 107.77, 52.83, 42.25, 30.42, 27.70, 24.97, 21.36, 13.22. ESI-MS calcd for  $\text{C}_{27}\text{H}_{28}\text{F}_3\text{NO}_4\text{S}^+$  (M $^+$ ): 530.58. Found: 530.16

## 2. $^1\text{H}$ NMR, $^{13}\text{C}$ NMR and Mass spectra

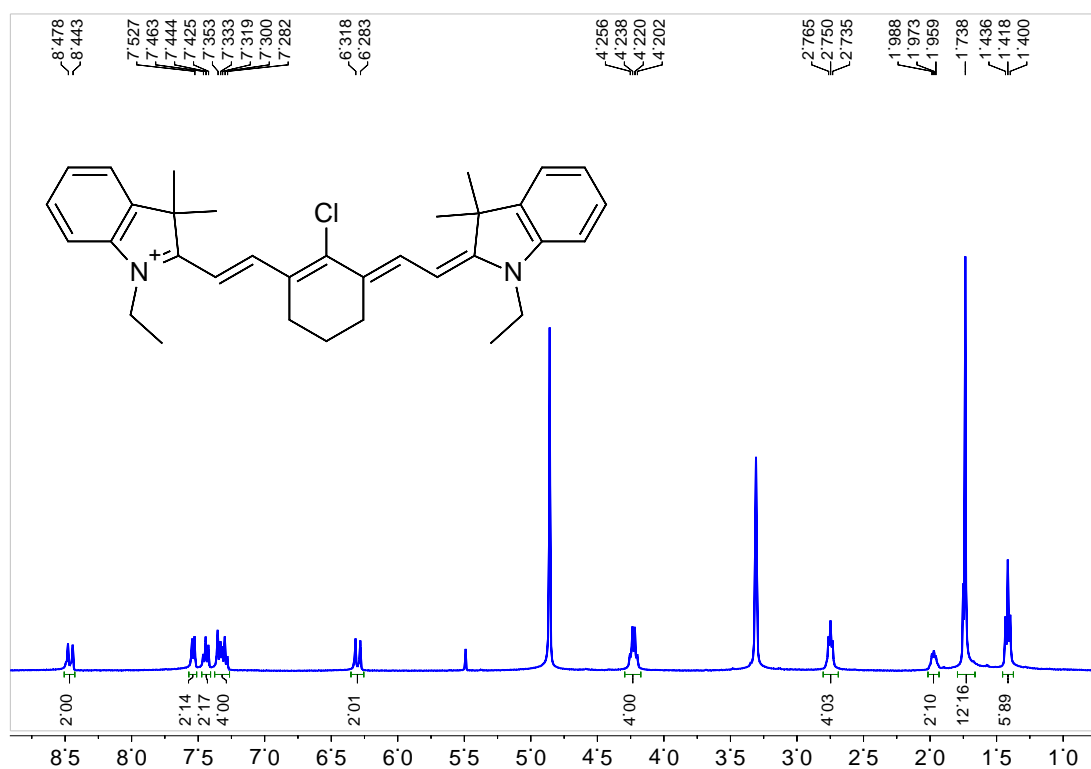

**Fig. S1**  $^1\text{H}$  NMR (400 MHz) spectrum of **compound 1** in  $\text{CD}_3\text{OD}$

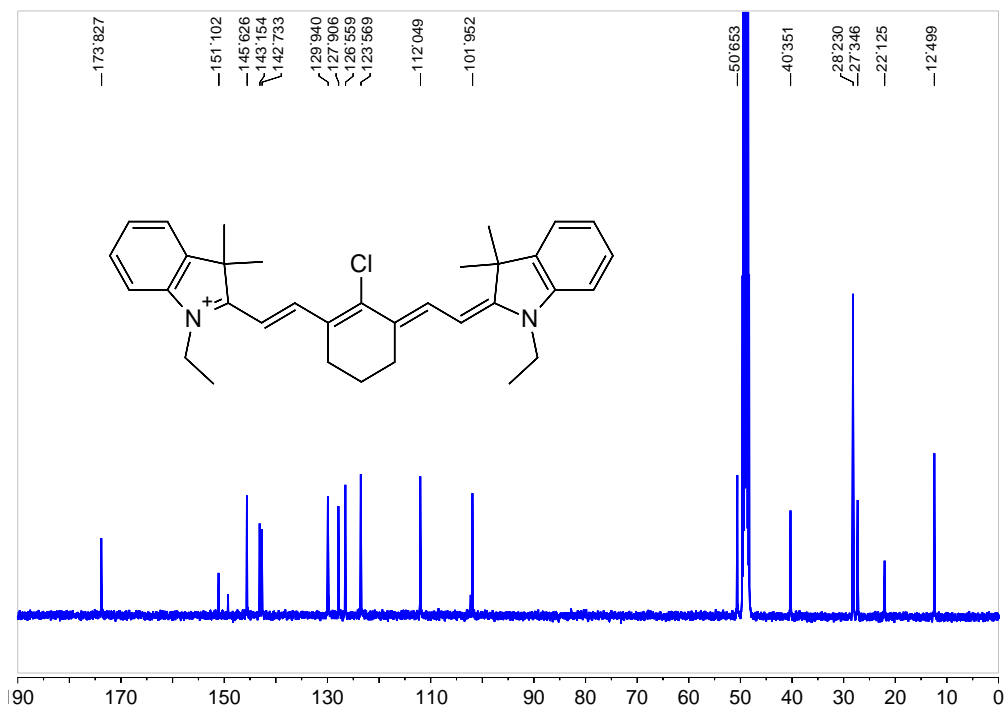

**Fig. S2**  $^{13}\text{C}$  NMR (100 MHz) spectrum of **compound 1** in  $\text{CD}_3\text{OD}$

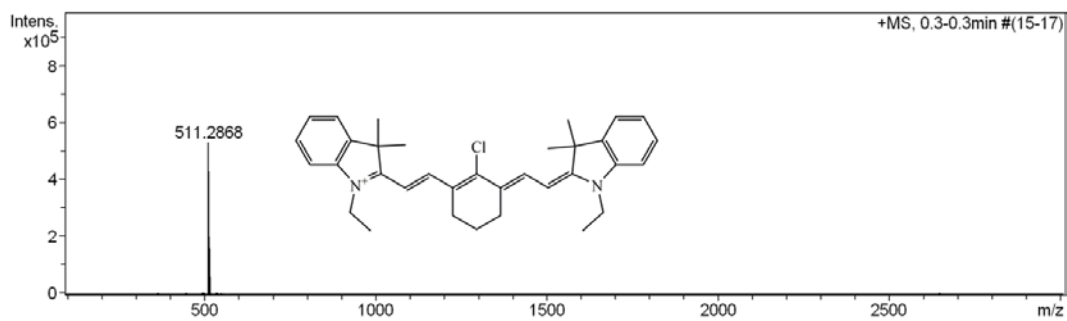

**Fig. S3** Mass spectrum of **compound 1**

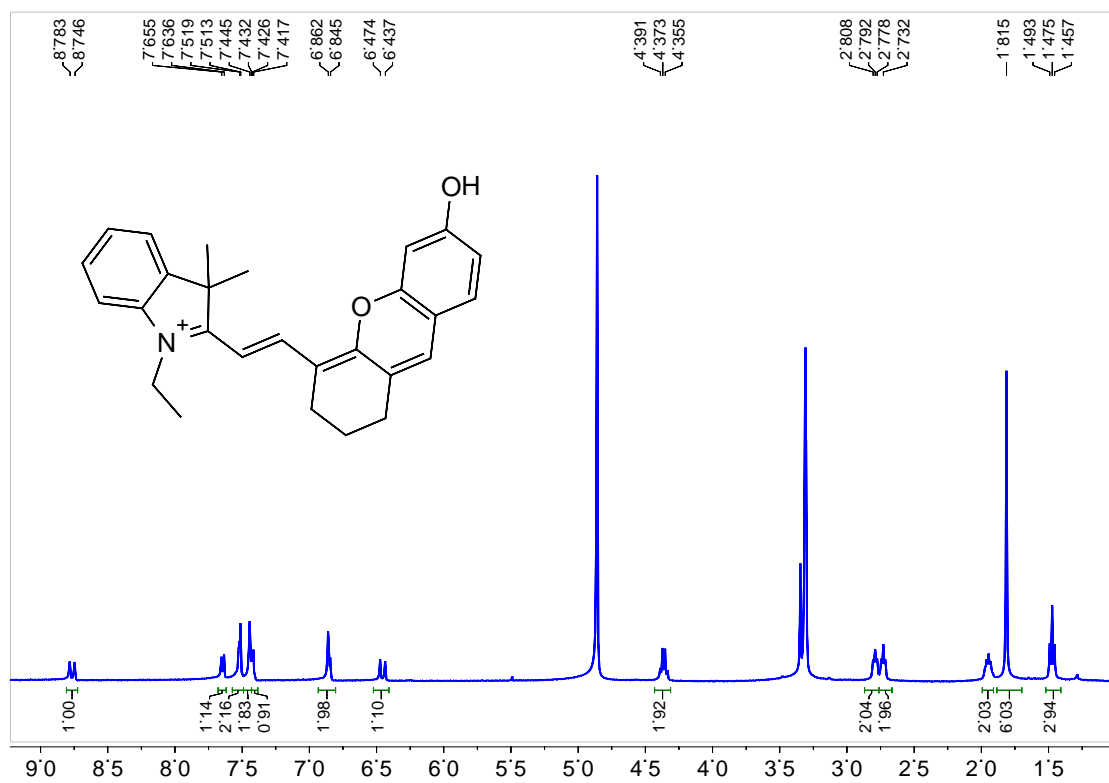

**Fig. S4**  $^1\text{H}$  NMR (400 MHz) spectrum of **compound 2** in  $\text{CD}_3\text{OD}$

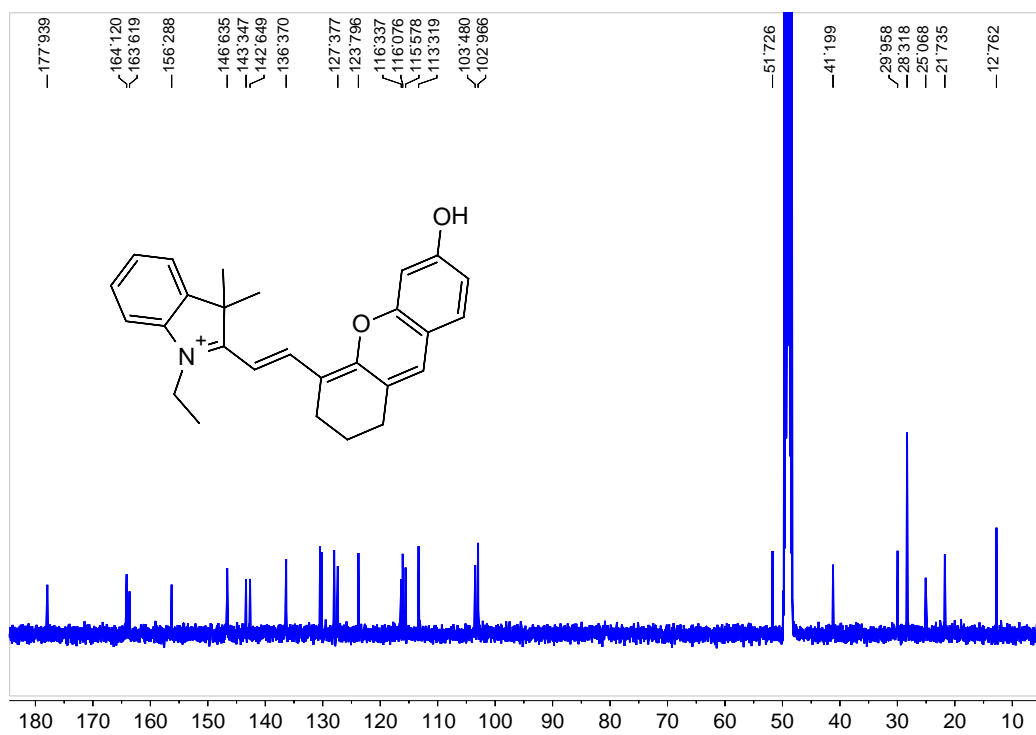

**Fig. S5**  $^{13}\text{C}$  NMR (100 MHz) spectrum of **compound 2** in  $\text{CD}_3\text{OD}$

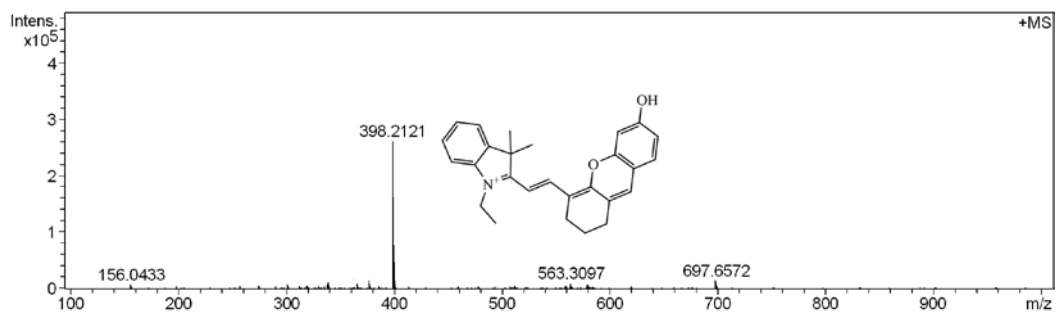

**Fig. S6** Mass spectrum of compound 2

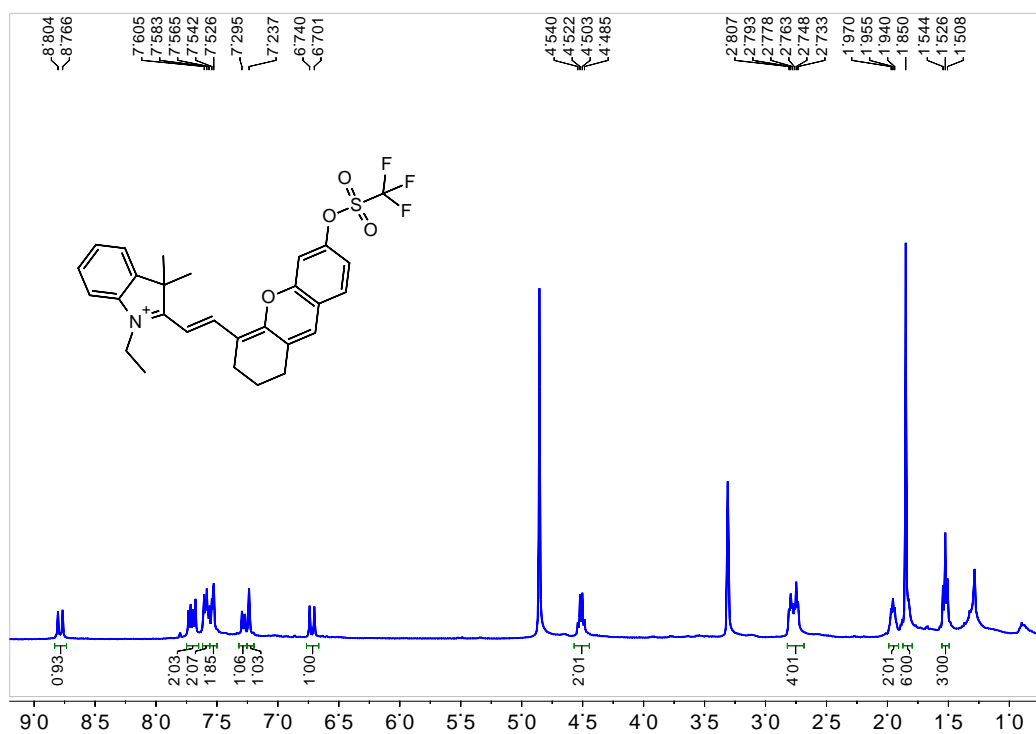

**Fig. S7** <sup>1</sup>H NMR (400 MHz) spectrum of CyT in CD<sub>3</sub>OD

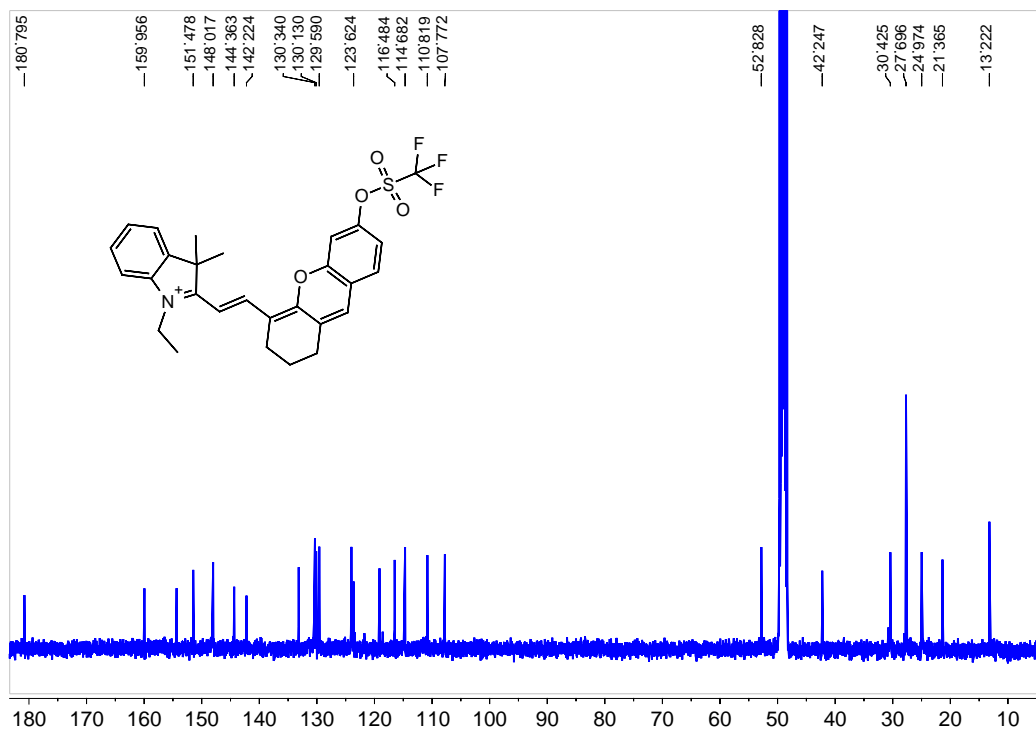

**Fig. S8** <sup>13</sup>C NMR (100 MHz) spectrum of CyT in CD<sub>3</sub>OD

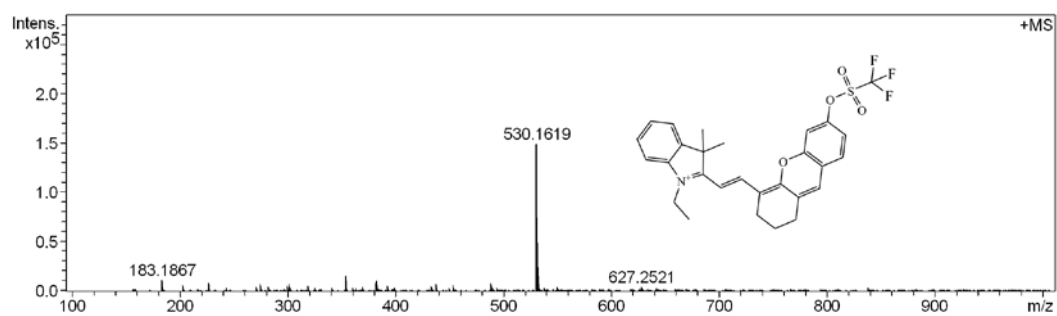

**Fig. S9** Mass spectrum of CyT

### 3. Supporting figures

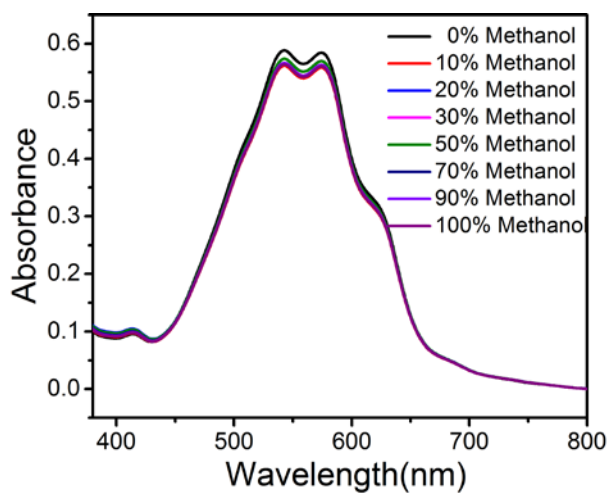

**Fig. S10** The absorption spectra of CyT in methanol/PBS mixtures with different methanol fractions.

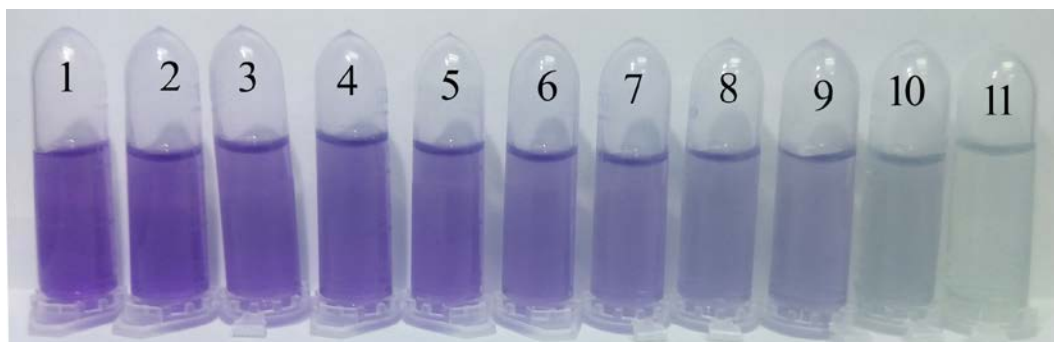

**Fig. S11** The color change of CyT (10  $\mu$ M) upon addition of S<sup>2-</sup>/HS<sup>-</sup> in PBS buffer (10 mM, pH 7.40, 2% methanol, v/v). Each picture was recorded at 5 min after the addition of S<sup>2-</sup>/HS<sup>-</sup> (1-11: 0, 1.0, 2.0, 3.0, 4.0, 5.0, 6.0, 7.0, 8.0, 9.0, 10.0  $\mu$ M).



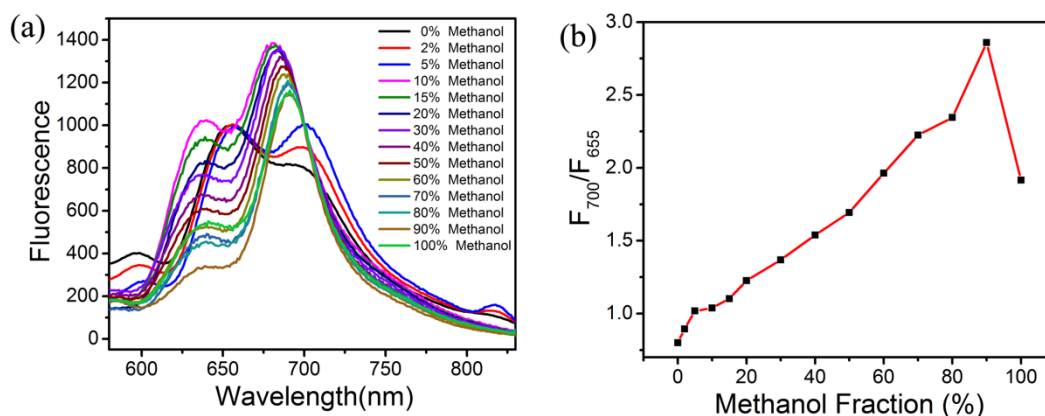

**Fig. S12** (a) Normalized fluorescence spectra of CyT in methanol /PBS mixtures with different methanol fractions. (b) Effect of methanol volume on the fluorescence intensity ratio of 700 nm and 655nm ( $F_{700}/F_{655}$ ),  $\lambda_{ex}$ , 575 nm.

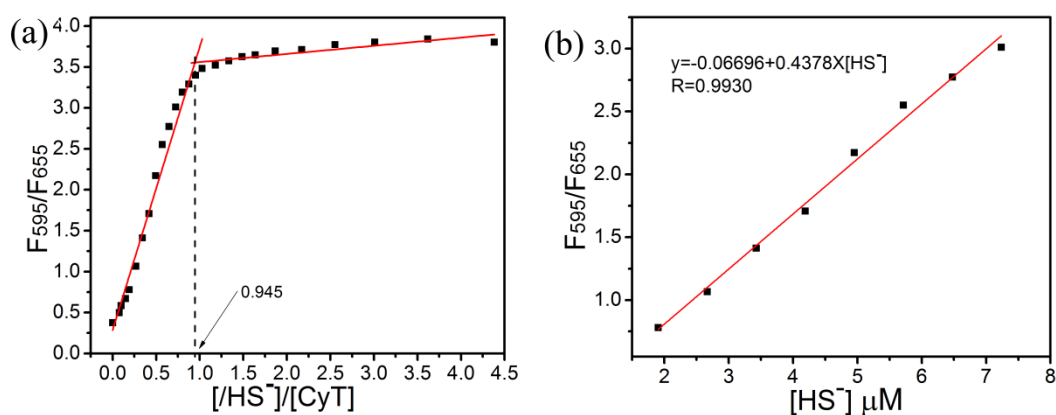

**Fig. S13** (a) Fluorescence emission ratio  $F_{595}/F_{655}$  of CyT (10  $\mu\text{M}$ ) in PBS buffer (10 mM, pH 7.40, 2% methanol, v/v) as a function of  $\text{HS}^-/\text{CyT}$  in the range of 0~4 upon excitation at 575 nm. (b) Fluorescence emission ratio  $F_{595}/F_{655}$  of CyT (10  $\mu\text{M}$ ) in PBS buffer (10 mM, pH 7.40, 2% methanol, v/v) as a function of  $\text{HS}^-$  concentration in the range of 2~7.5  $\mu\text{M}$  upon excitation at 575 nm.

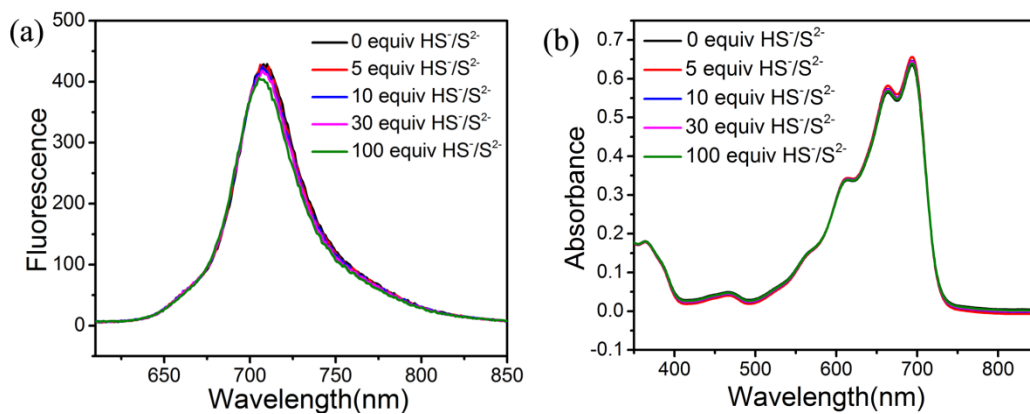

**Fig. S14** (a) Fluorescence emission spectra of **compound 2** (10  $\mu\text{M}$ ) in PBS (10 mm, pH 7.40, 2% methanol, v/v) obtained upon different amount of  $\text{S}^{2-}/\text{HS}^-$ .  $\lambda_{\text{ex}}$ , 575 nm. (b) Absorption spectra of **compound 2** (10  $\mu\text{M}$ ) in PBS (10.0 mM, pH 7.40, 2% methanol, v/v) obtained upon different amount of  $\text{S}^{2-}/\text{HS}^-$ .

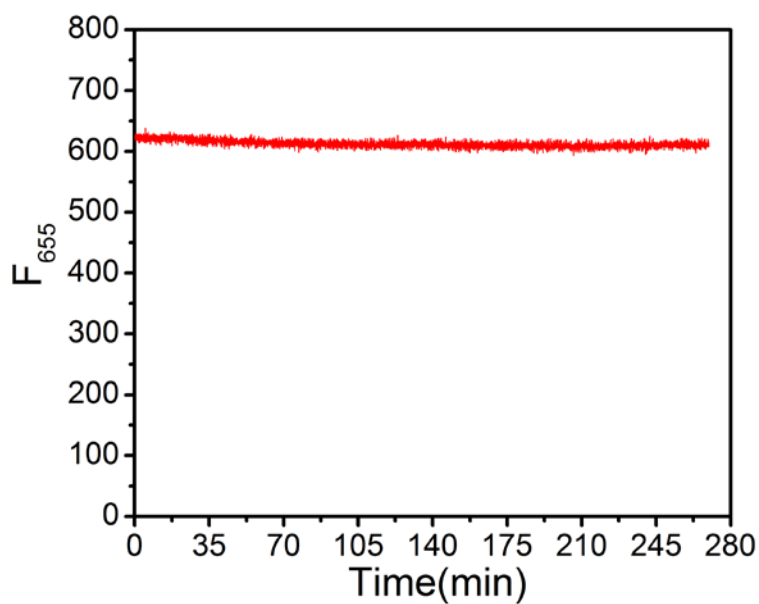

**Fig. S15** Fluorescence intensity of **CyT** at 655nm as a function of time,  $\lambda_{\text{ex}}$ , 575 nm.

Table S1. The comparison of new probe herein with other representative probes reported.

| Probe                                   | Spectral change          | $\lambda_{em}$ | Response time or rate constant | The detection limit. | Solution                   |
|-----------------------------------------|--------------------------|----------------|--------------------------------|----------------------|----------------------------|
| <b>F-3</b> <sup>1</sup>                 | Fluorescence turn-on     | 510nm          | 0.0141 s <sup>-1</sup>         | 24 nM                | DMSO:HEPES = 1:100         |
| <b>BH-HS</b> <sup>2</sup>               | Fluorescence turn-on     | 553 nm         | 160 s                          | 1.7 $\mu$ M          | DMF:PBS = 1:1              |
| <b>CPC</b> <sup>3</sup>                 | Fluorescence ratiometric | 587 nm/474 nm  | 600 s                          | 40 nM                | DMF:PBS = 4:6              |
| <b>FEPO</b> <sup>4</sup>                | Fluorescence turn-off    | 520 nm         | 0.00411 s <sup>-1</sup>        | —                    | Methanol:PBS = 1:99        |
| <b>NR-HS</b> <sup>5</sup>               | Fluorescence turn-on     | 655 nm         | 20 min                         | 0.27 $\mu$ M         | DMSO: PBS = 1:9            |
| <b>1</b> <sup>6</sup>                   | Fluorescence ratiometric | 566 nm/620 nm  | 60 min                         | 0.1 $\mu$ M          | PBS                        |
| <b>CouMC</b> <sup>7</sup>               | Fluorescence ratiometric | 652 nm/510 nm  | 10 s                           | 1 $\mu$ M            | DMSO: PBS = 1:49           |
| <b>Cy-N<sub>3</sub></b> <sup>8</sup>    | Fluorescence ratiometric | 710 nm/750 nm  | 20 min                         | —                    | HEPES                      |
| <b>AzMB-coumarin</b> <sup>9</sup>       | Fluorescence turn-on     | 450 nm         | 20 min                         | 10 $\mu$ M           | Acetonitrile:PBS = 1:4     |
| <b>Cy-NO<sub>2</sub></b> <sup>10</sup>  | Fluorescence turn-on     | 809 nm         | 70 min                         | —                    | HEPES                      |
| <b>HSN2</b> <sup>11</sup>               | Fluorescence turn-on     | 542 nm         | 45 min                         | —                    | PIPES                      |
| <b>NIR-H<sub>2</sub>S</b> <sup>12</sup> | Fluorescence turn-on     | 708 nm         | 0.006 s <sup>-1</sup>          | 50 nM                | —                          |
| <b>HSip-1</b> <sup>13</sup>             | Fluorescence turn-on     | 516 nm         | <1 s                           | —                    | PIPES                      |
| <b>DNS-Az</b> <sup>14</sup>             | Fluorescence turn-on     | 525 nm         | <1 s                           | —                    | Tween:PBS = 1:200          |
| <b>BOD-PhSe</b> <sup>15</sup>           | Fluorescence turn-off    | 610 nm         | 20 min                         | 2.5 nM               | DMSO:HEPES = 1:9           |
| <b>probe 1</b> <sup>16</sup>            | Fluorescence turn-on     | 532 nm         | 0.00204 s <sup>-1</sup>        | 2.46 $\mu$ M         | Acetonitrile:PBS = 1:9     |
| <b>Azidoluciferin</b> <sup>17</sup>     | Fluorescence turn-on     | —              | 60 min                         | 0.1 $\mu$ M          | PBS                        |
| <b>P1</b> <sup>18</sup>                 | Fluorescence turn-on     | 524 nm         | 15 min                         | 50 nM                | Acetonitrile: HEPES = 1:99 |
| <b>SulpHensor</b> <sup>19</sup>         | Fluorescence turn-on     | 555 nm         | 0.00049 s <sup>-1</sup>        | 0.5 $\mu$ M          | DMF:PBS = 1:9              |
| <b>PAC</b> <sup>20</sup>                | Fluorescence             | 605 nm         | <1 s                           | 16 nM                | BBS                        |

|                                      | turn-on                  |               |                        |                    |                        |
|--------------------------------------|--------------------------|---------------|------------------------|--------------------|------------------------|
| <b>Lyso-NHS<sup>21</sup></b>         | Fluorescence turn-on     | 555 nm        | 20 min                 | 0.48 $\mu\text{M}$ | Acetonitrile:PBS = 1:9 |
| <b>1-H<sub>2</sub>S<sup>22</sup></b> | Fluorescence turn-on     | 635 nm        | 15 min                 | 50 $\mu\text{M}$   | DMSO: PBS = 1:4        |
| <b>This work</b>                     | Fluorescence ratiometric | 655 nm/595 nm | 0.1464 s <sup>-1</sup> | 7.33 nM            | Methanol:PBS = 1:49    |

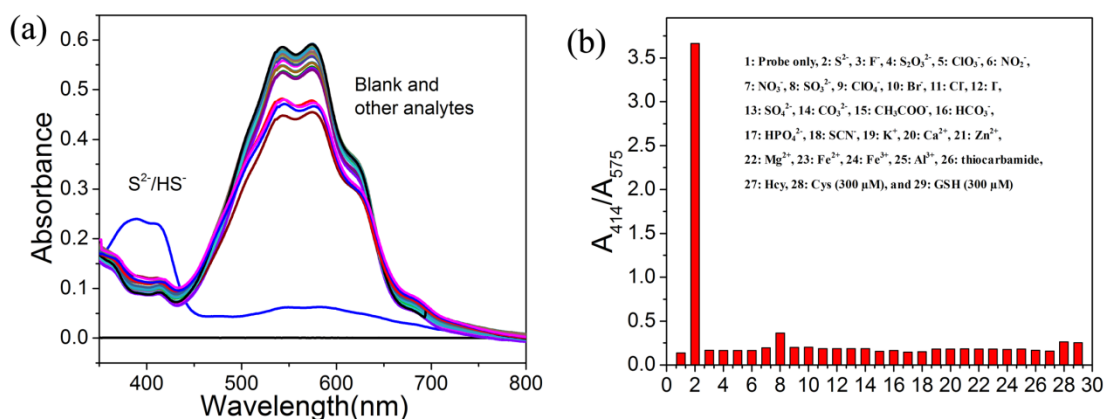

**Fig. S16** (a) Absorption spectra and (b) absorbance ratio ( $A_{414}/A_{575}$ ) of **CyT** (10  $\mu\text{M}$ ) in PBS (10 mm, pH 7.40, 2% methanol, v/v) in the presence of (1 equiv)  $\text{S}^{2-}/\text{HS}^-$  and (15–30 equiv) various biologically relevant species ( $\text{F}^-$ ,  $\text{S}_2\text{O}_3^{2-}$ ,  $\text{ClO}_3^-$ ,  $\text{NO}_2^-$ ,  $\text{NO}_3^-$ ,  $\text{HSO}_3^-$ ,  $\text{ClO}_4^-$ ,  $\text{Br}^-$ ,  $\text{Cl}^-$ ,  $\text{I}^-$ ,  $\text{SO}_4^{2-}$ ,  $\text{CO}_3^{2-}$ ,  $\text{CH}_3\text{COO}^-$ ,  $\text{HCO}_3^-$ ,  $\text{HPO}_4^{2-}$ ,  $\text{SCN}^-$ ,  $\text{K}^+$ ,  $\text{Ca}^{2+}$ ,  $\text{Zn}^{2+}$ ,  $\text{Mg}^{2+}$ ,  $\text{Fe}^{2+}$ ,  $\text{Fe}^{3+}$ ,  $\text{Al}^{3+}$ , thiocarbamide, Cys, Hcy and GSH).

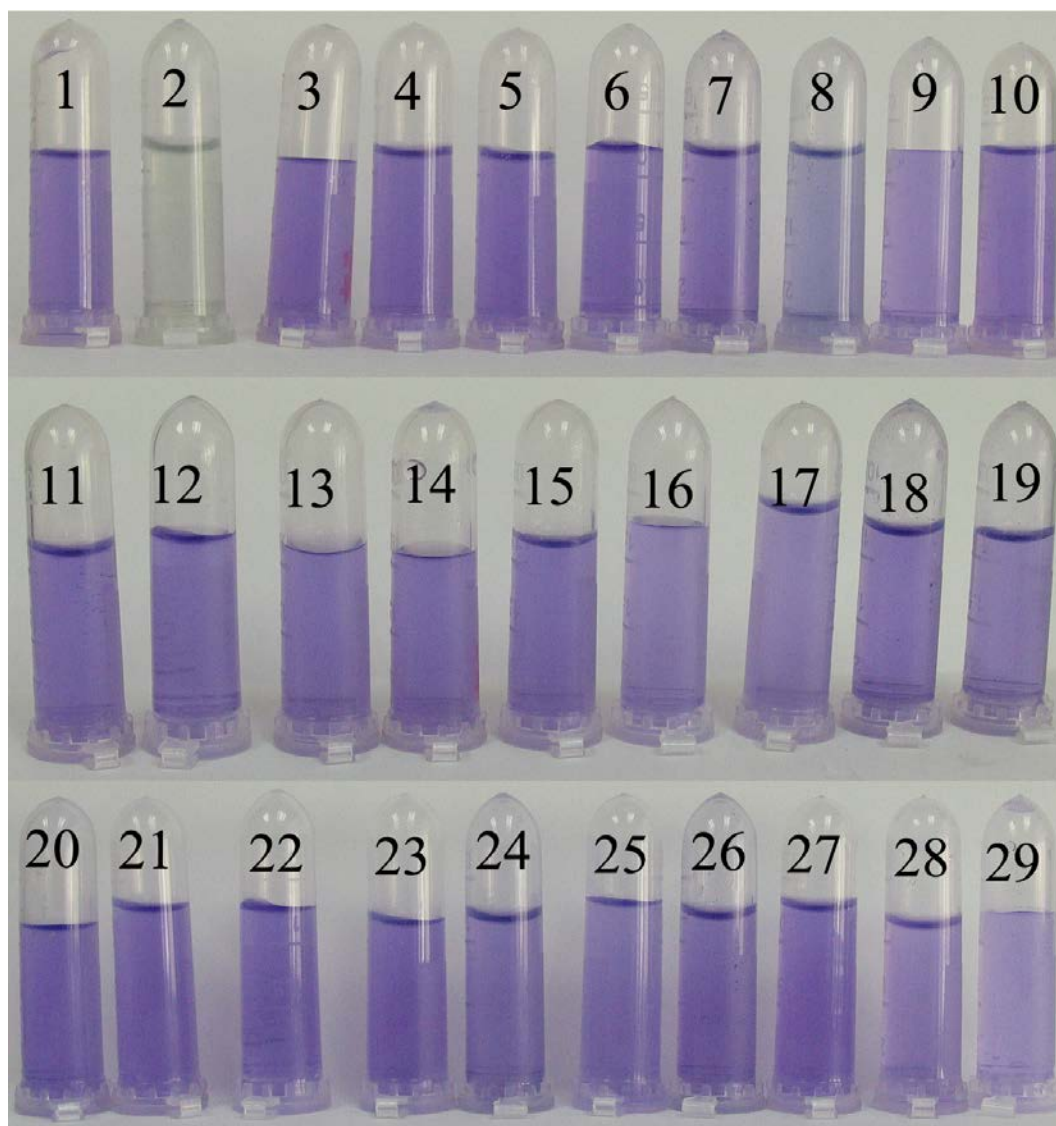

**Fig. S17** Color change of **CyT** (10  $\mu\text{M}$ ) with  $\text{Na}_2\text{S}$  (10  $\mu\text{M}$ ) various analytes (150  $\mu\text{M}$ ). The pictures were recorded at 5 min after addition of the analytes (1: black, 2:  $\text{S}^{2-}$ , 3:  $\text{F}^-$ , 4:  $\text{S}_2\text{O}_3^{2-}$ , 5:  $\text{ClO}_3^-$ , 6:  $\text{NO}_2^-$ , 7:  $\text{NO}_3^-$ , 8:  $\text{SO}_3^{2-}$ , 9:  $\text{ClO}_4^-$ , 10:  $\text{Br}^-$ , 11:  $\text{Cl}^-$ , 12:  $\text{I}^-$ , 13:  $\text{SO}_4^{2-}$ , 14:  $\text{CO}_3^{2-}$ , 15:  $\text{CH}_3\text{COO}^-$ , 16:  $\text{HCO}_3^-$ , 17:  $\text{HPO}_4^{2-}$ , 18:  $\text{SCN}^-$ , 19:  $\text{K}^+$ , 20:  $\text{Ca}^{2+}$ , 21:  $\text{Zn}^{2+}$ , 22:  $\text{Mg}^{2+}$ , 23:  $\text{Fe}^{2+}$ , 24:  $\text{Fe}^{3+}$ , 25:  $\text{Al}^{3+}$ , 26: thiocarbamide, 27: Hcy, 28: Cys (300  $\mu\text{M}$ ), and 29: GSH (300  $\mu\text{M}$ ))

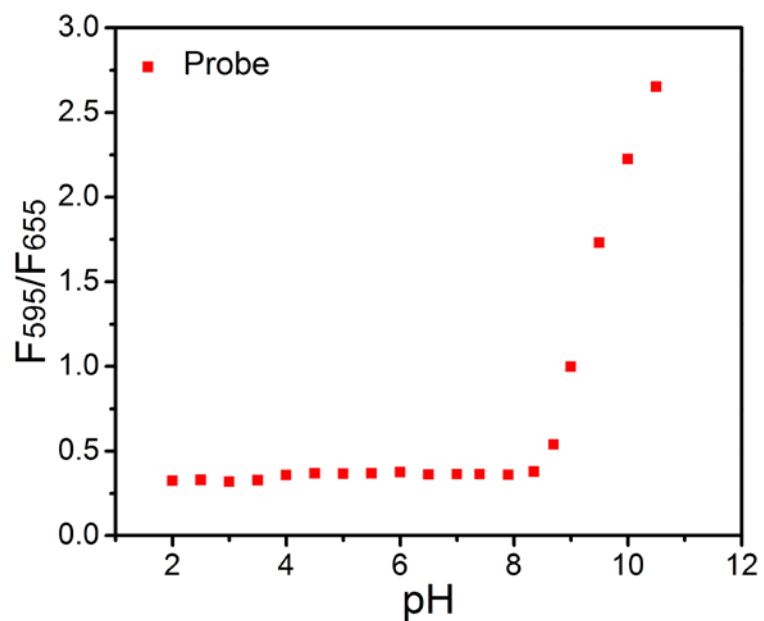

**Fig. S18** Emission ratio  $F_{595}/F_{655}$  of CyT in PBS buffer (10 mM, pH 7.40, 2% methanol, v/v) at different pH values upon excitation at 545 nm.

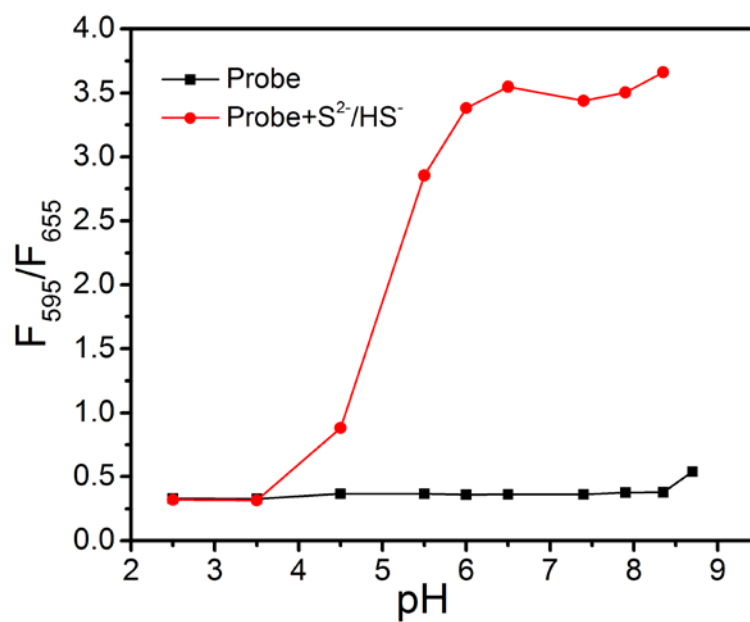

**Fig. S19** The pH effect on the fluorescence behavior of CyT (black line) and CyT with  $S^{2-}/HS^{-}$  (red line).

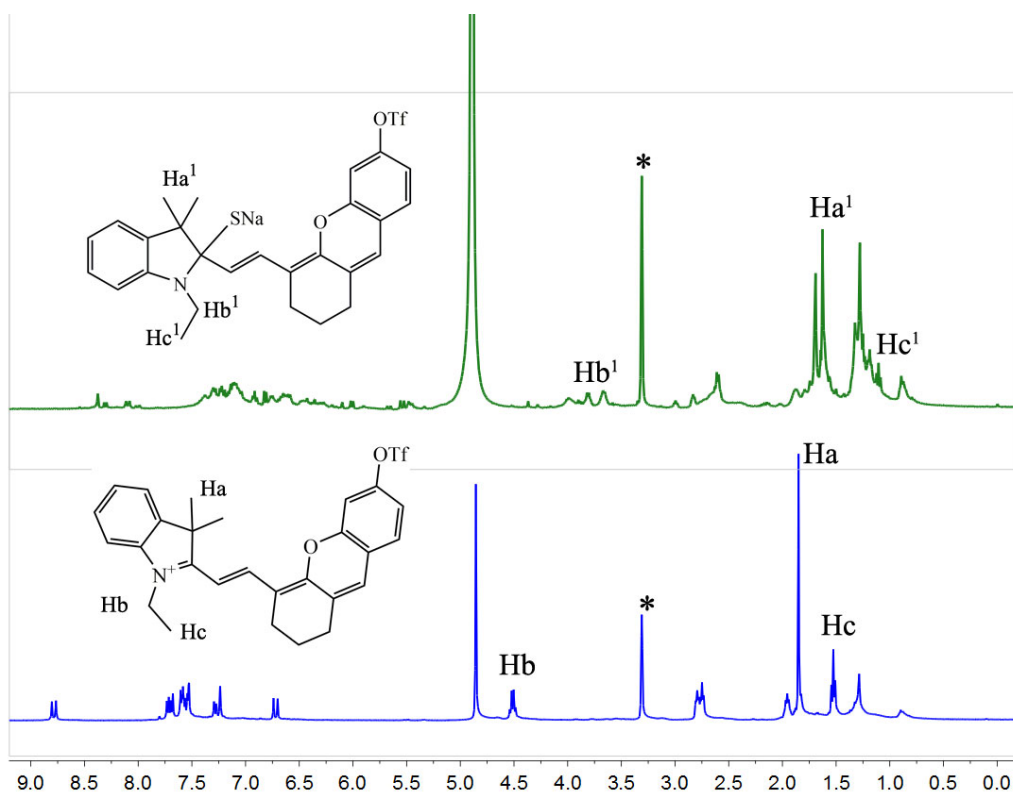

**Fig. S20**  $^1\text{H}$  NMR spectra of CyT in the absence (bottom) and presence (top) of 1.5 equiv  $\text{S}^{2-}/\text{HS}^-$  in  $\text{CD}_3\text{OD}$ . Signals marked with \* are from the solvent.

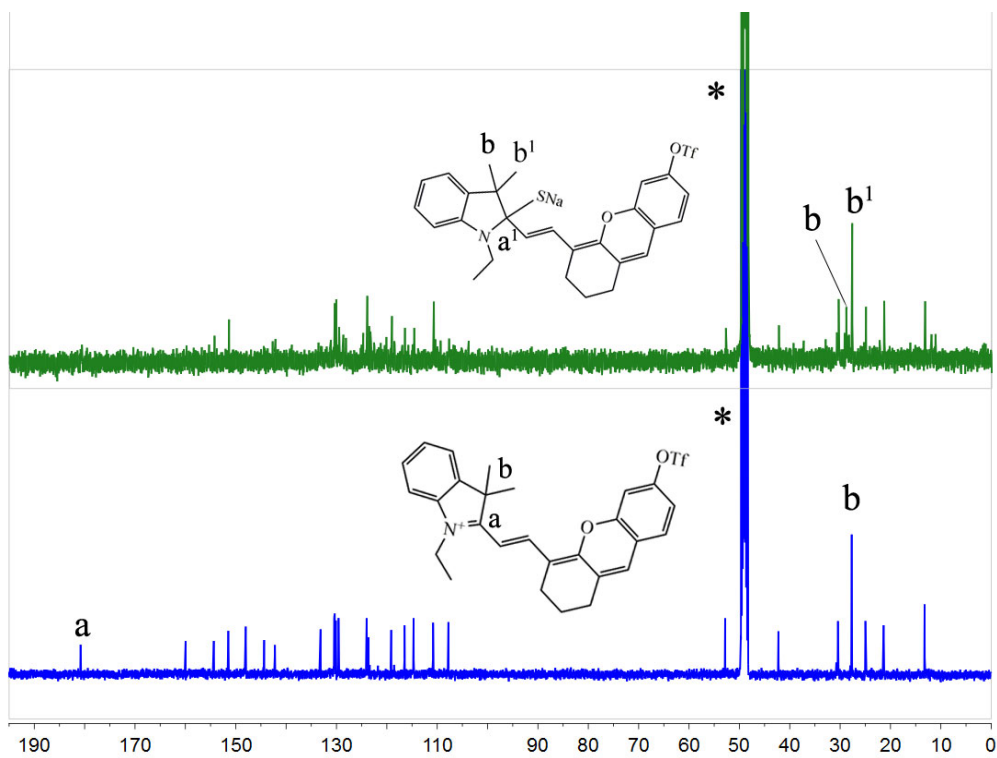

**Fig. S21**  $^{13}\text{C}$  NMR spectra of CyT in the absence (bottom) and presence (top) of 1.5 equiv  $\text{S}^{2-}/\text{HS}^-$  in  $\text{CD}_3\text{OD}$ . Signals marked with \* are from the solvent.

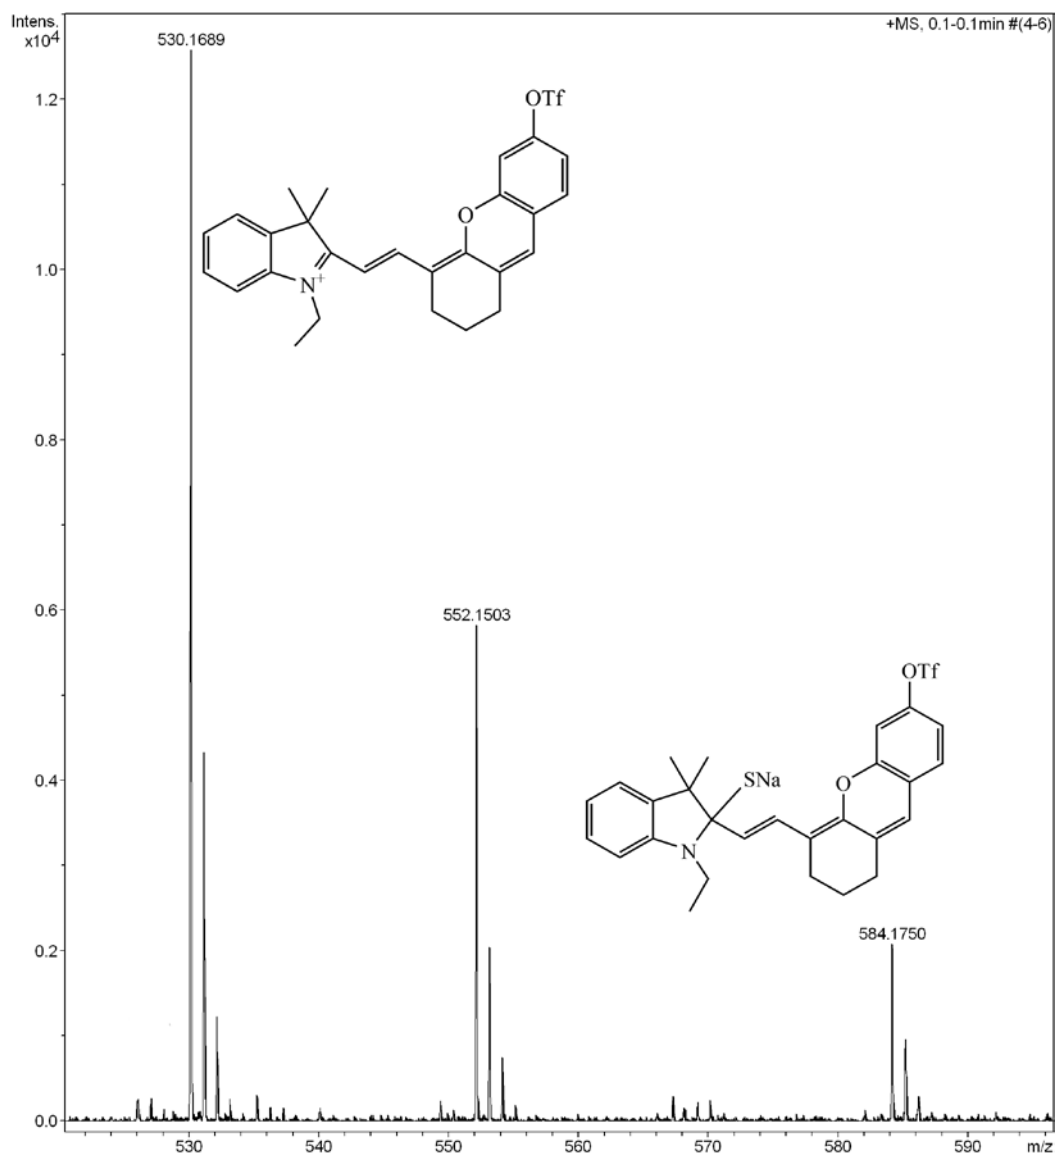

**Fig. S22** The ESI-MS of product obtained by reaction of **CyT** and  $\text{Na}_2\text{S}$



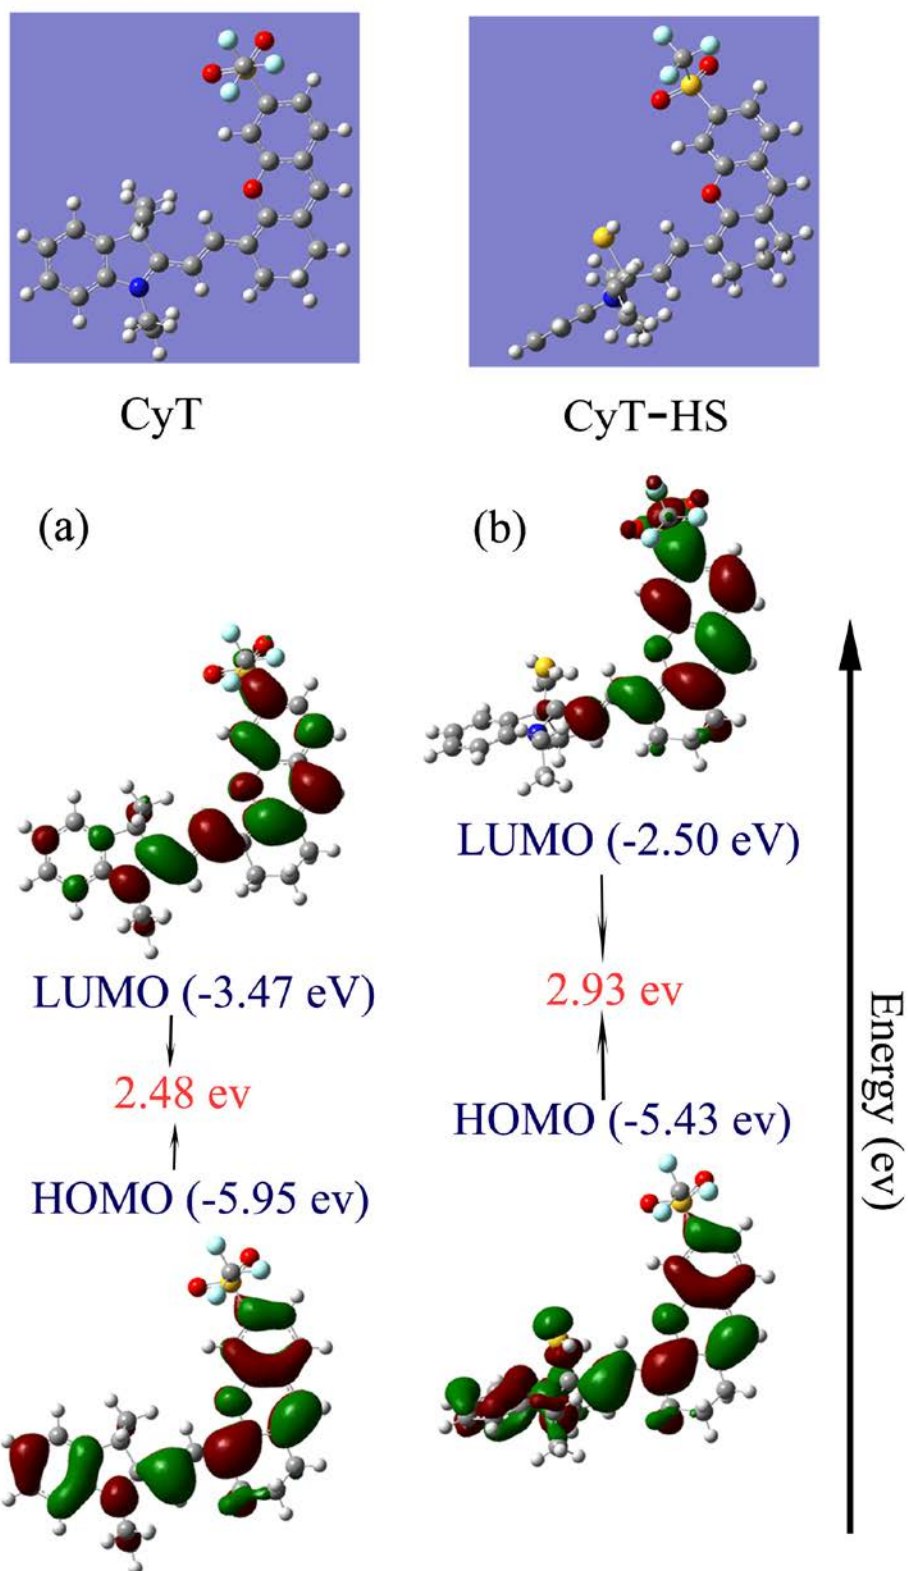

**Fig. S23** Optimized structures and frontier molecular orbitals (MOs) of CyT before (a) and after (b) reacting with  $S^{2-}/HS^-$ . Calculations were based on ground state geometry by density functional theory (DFT) at the B3LYP/6-311G (d, p)/level using Gaussian 09 in water. In the ball-and-stick representation, carbon, nitrogen, oxygen, sulfur and fluorine atoms are colored in gray, blue, red, yellow and canal blue, respectively.

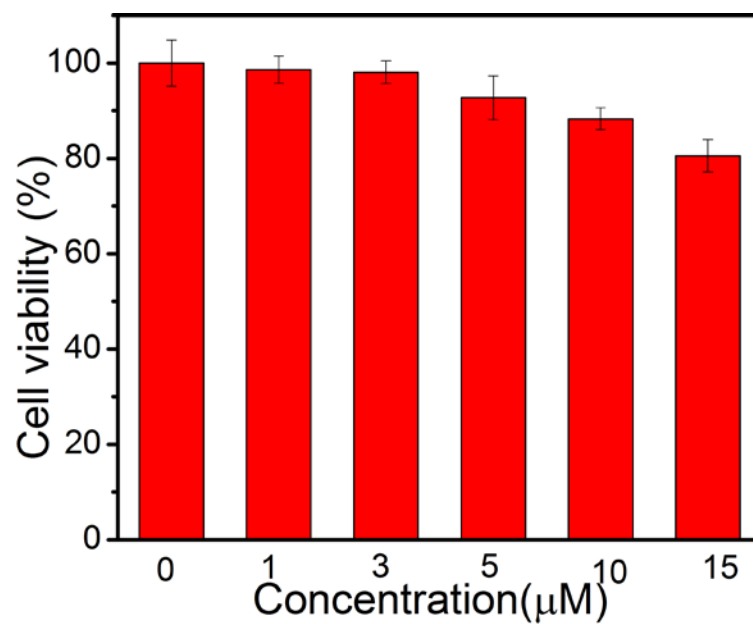

**Fig. S24** CCK-8 assay for the survival rate of HeLa cells treated with various concentrations of **CyT** for 24 h. Error bars represent the standard deviations of 6 trials.

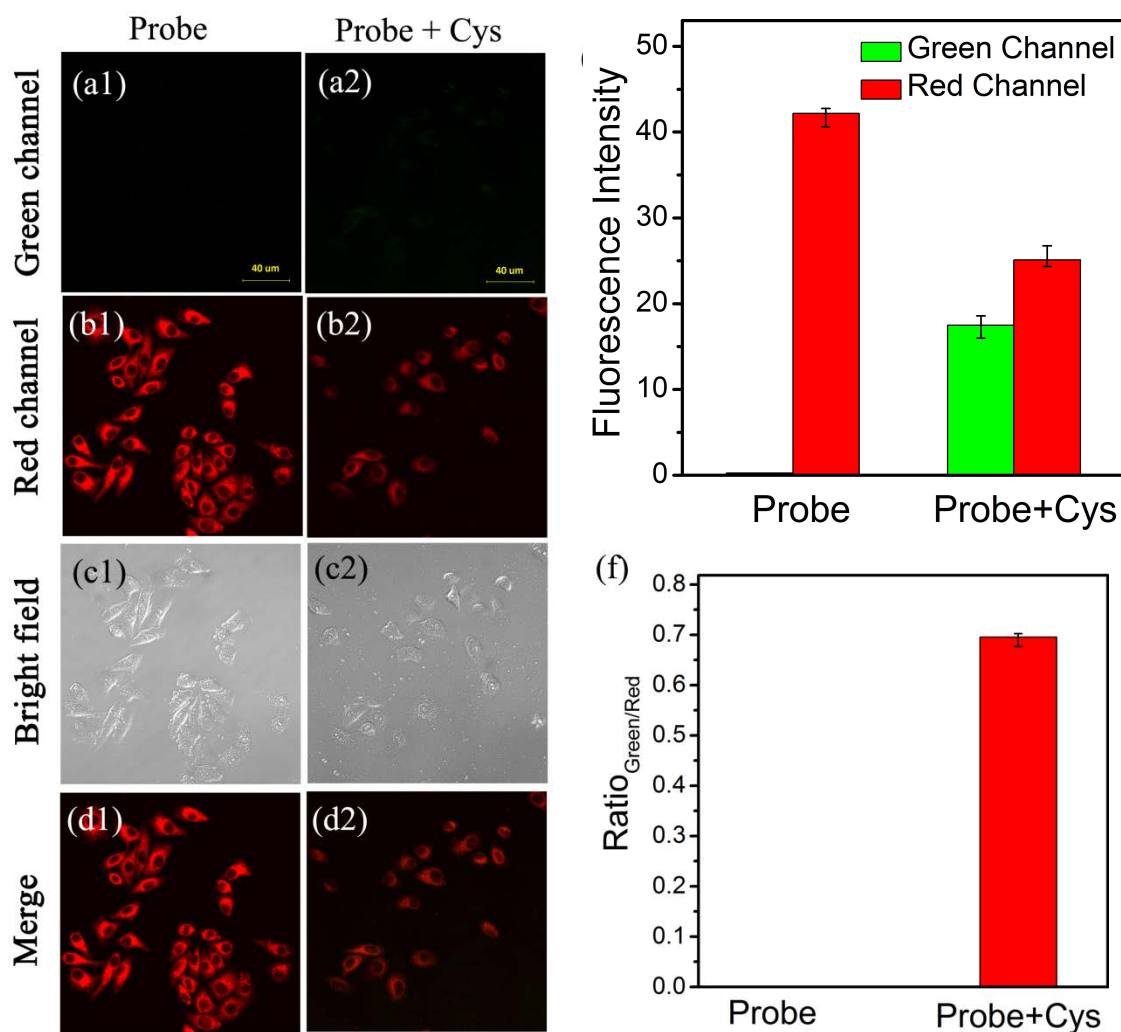

**Fig. S25** Confocal images of **CyT** responds to endogenous  $\text{H}_2\text{S}$  in HeLa cells. (a1–d1) HeLa cells were incubated with **CyT** (10  $\mu\text{M}$ ) for 30 min; (a2–d2) HeLa cells were stimulated with Cys (100  $\mu\text{M ml}^{-1}$ ) for 3 h, then incubated with 10  $\mu\text{M}$  **CyT** for 30 min. (e) Quantitative analysis of fluorescence intensity of green and red channel in HeLa cells incubated with **CyT** and Cys. (f) Fluorescence intensity ratios ( $F_{\text{Green}}/F_{\text{Red}}$ ) of HeLa cells incubated with **CyT** and Cys. Error bars represent standard deviation (SD),  $n=3$ . Green channel:  $\lambda_{\text{em}} = 500 - 550 \text{ nm}$  ( $\lambda_{\text{ex}} = 488 \text{ nm}$ ); Red channel:  $\lambda_{\text{em}} = 570 - 620 \text{ nm}$  ( $\lambda_{\text{ex}} = 559 \text{ nm}$ ); Bright field, Merge; Scale bar, 40  $\mu\text{m}$ .

## References

- 1 J. Lv, F. Wang, J. Qiang, X. Ren, Y. Chen, Z. Zhang, Y. Wang, W. Zhang and X. Chen, *Biosens. Bioelectron.*, 2017, **87**, 96-100.
- 2 M. Ren, B. Deng, X. Kong, K. Zhou, K. Liu, G. Xu and W. Lin, *Chem. Commun.*, 2016, **52**, 6415-6418.
- 3 X. Feng, T. Zhang, J.-T. Liu, J.-Y. Miao and B.-X. Zhao, *Chem. Commun.*, 2016, **52**, 3131-3134.
- 4 P. Sathyadevi, Y. J. Chen, S. C. Wu, Y. H. Chen and Y. M. Wang, *Biosens. Bioelectron.*, 2015, **68**, 681-687.
- 5 C. Tang, Q. Zheng, S. Zong, Z. Wang and Y. Cui, *Sens. Actuators, B*, 2014, **202**, 99-104.
- 6 Q. Wan, Y. Song, Z. Li, X. Gao and H. Ma, *Chem. Commun.*, 2013, **49**, 502-504.
- 7 Y. Chen, C. Zhu, Z. Yang, J. Chen, Y. He, Y. Jiao, W. He, L. Qiu, J. Cen and Z. Guo, *Angew. Chem. Int. Ed.*, 2013, **52**, 1688-1691.
- 8 F. Yu, P. Li, P. Song, B. Wang, J. Zhao and K. Han, *Chem. Commun.*, 2012, **48**, 2852-2854.
- 9 Z. Wu, Z. Li, L. Yang, J. Han and S. Han, *Chem. Commun.*, 2012, **48**, 10120-10122.
- 10 R. Wang, F. Yu, L. Chen, H. Chen, L. Wang and W. Zhang, *Chem. Commun.*, 2012, **48**, 11757-11759.
- 11 L. A. Montoya and M. D. Pluth, *Chem. Commun.*, 2012, **48**, 4767-4769.
- 12 X. Cao, W. Lin, K. Zheng and L. He, *Chem. Commun.*, 2012, **48**, 10529-10531.
- 13 K. Sasakura, K. Hanaoka, N. Shibuya, Y. Mikami, Y. Kimura, T. Komatsu, T. Ueno, T. Terai, H. Kimura and T. Nagano, *J. Am. Chem. Soc.*, 2011, **133**, 18003-18005.
- 14 H. Peng, Y. Cheng, C. Dai, A. L. King, B. L. Predmore, D. J. Lefer and B. Wang, *Angew. Chem. Int. Ed.*, 2011, **50**, 9672-9675.
- 15 D. Gong, X. Zhu, Y. Tian, S. C. Han, M. Deng, A. Iqbal, W. Liu, W. Qin and H. Guo, *Anal. Chem.*, 2017, **89**, 1801-1807.
- 16 Y. L. Pak, J. Li, K. C. Ko, G. Kim, J. Y. Lee and J. Yoon, *Anal. Chem.*, 2016, **88**, 5476-5481.
- 17 X. Tian, Z. Li, C. Lau and J. Lu, *Anal. Chem.*, 2015, **87**, 11325-11331.
- 18 S. Singha, D. Kim, H. Moon, T. Wang, K. H. Kim, Y. H. Shin, J. Jung, E. Seo, S. J. Lee and K. H. Ahn, *Anal. Chem.*, 2015, **87**, 1188-1195.
- 19 S. Yang, Y. Qi, C. Liu, Y. Wang, Y. Zhao, L. Wang, J. Li, W. Tan and R. Yang, *Anal. Chem.*, 2014, **86**, 7508-7515.
- 20 Y. Ma, H. Su, X. Kuang, X. Li, T. Zhang and B. Tang, *Anal. Chem.*, 2014, **86**, 11459-11463.
- 21 T. Y. Liu, Z. Xu, D. R. Spring and J. N. Cui, *Org. Lett.*, 2013, **15**, 2310-2313.
- 22 K. Liu, C. Liu, H. Shang, M. Ren and W. Lin, *Sens. Actuators, B*, 2018, **256**, 342-350.
